# Supplementary material
Source: PubMed Central journal article supplement (PMC2667052)
Supplement: 0901819106_0901819106SI.pdf [file 0901819106_0901819106SI.pdf]

# Supporting Information

Pan et al. 10.1073/pnas.0901819106

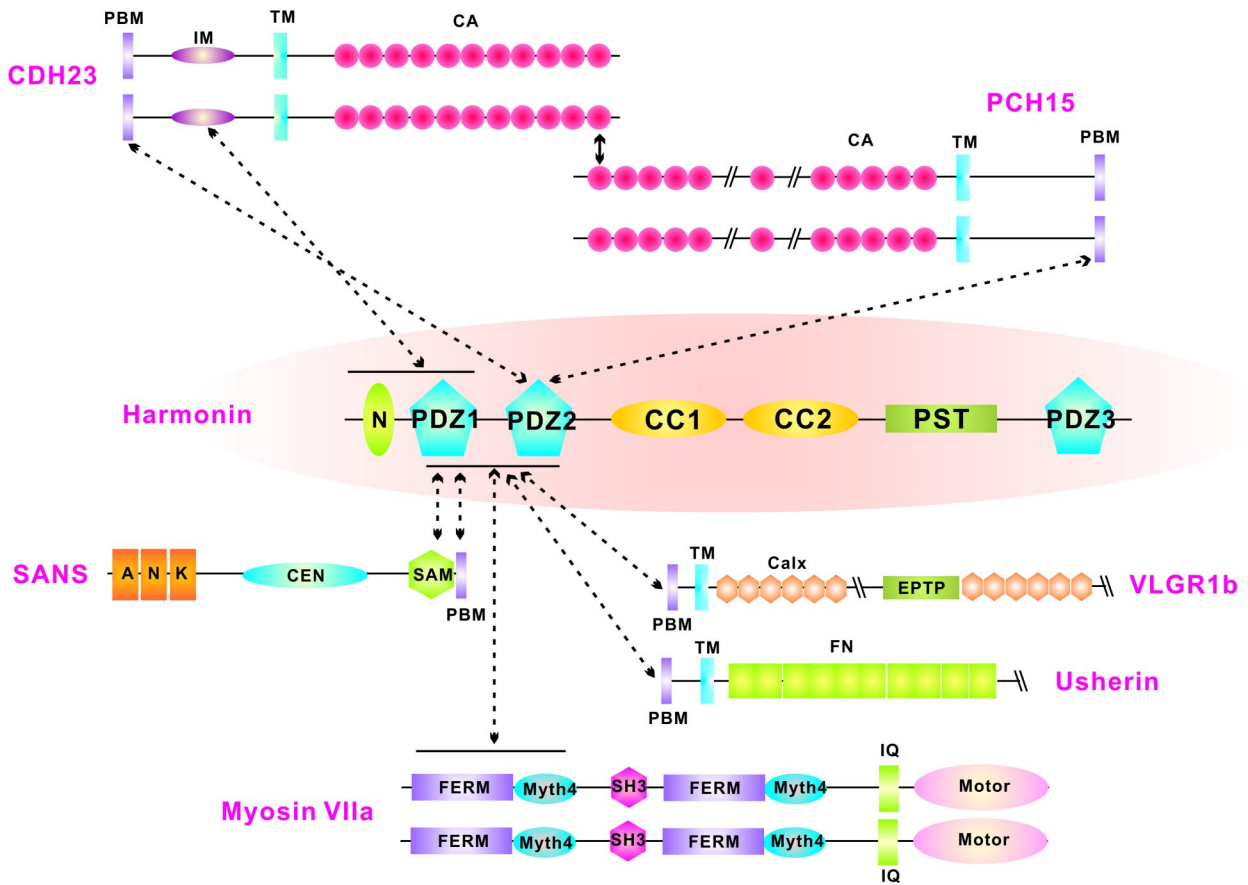

## Domain keys

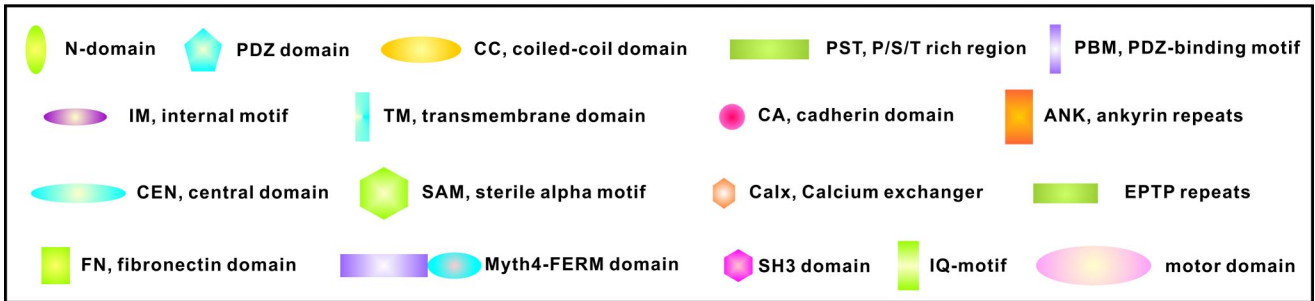

Fig. S1. The interaction network of the identified Usher proteins. In this presentation, the interactions that were previously known are indicated by black arrows and the newly-defined harmonin N-domain is also included. The figure also highlights that harmonin functions as the organization center for the assembly of the Usher protein interactome.



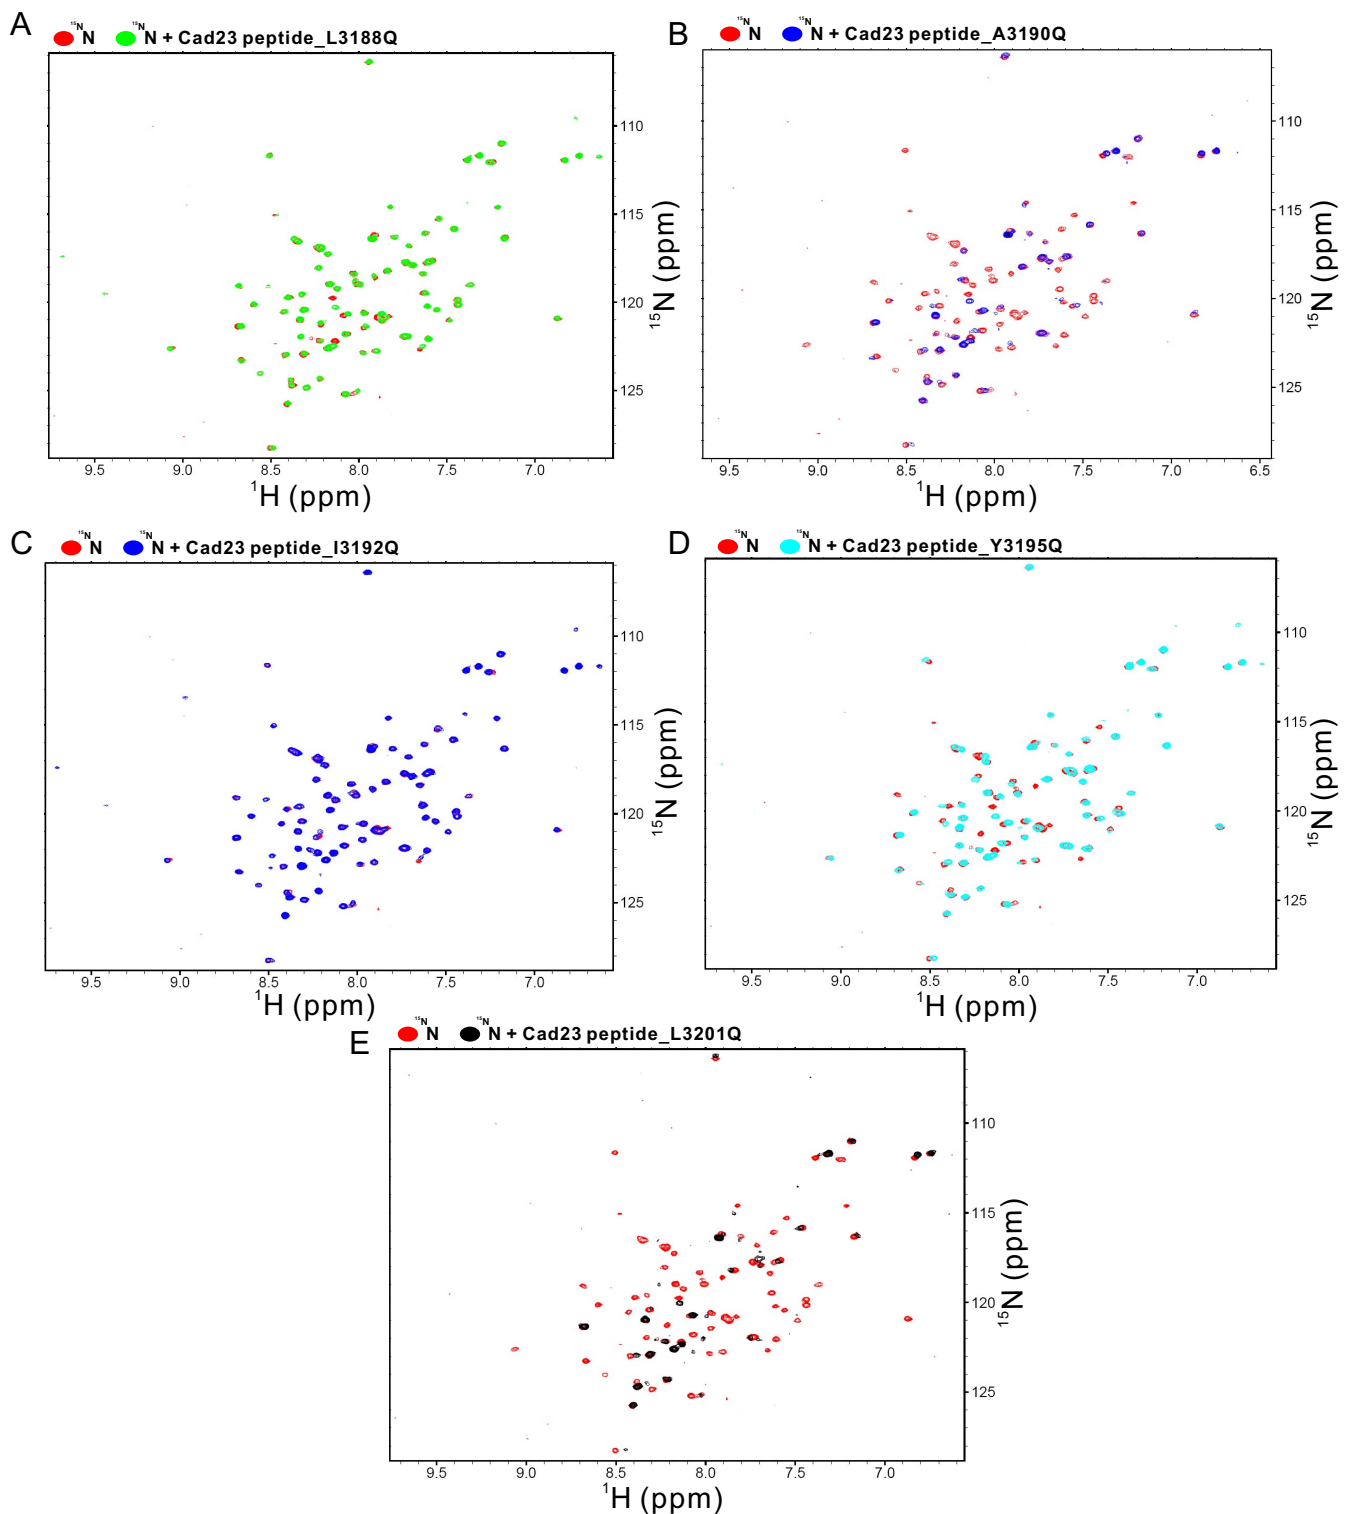

**Fig. S3.** Identification of the critical residues of the cadherin 23 internal peptide required for binding to the harmonin N-domain. Superposition plot of the  $^1\text{H}$ - $^{15}\text{N}$  HSQC spectra of the free-form harmonin N-domain and the protein in the presence of excess amounts of various forms of GB1-tagged Cad23 peptide mutants. (A, C, and D) Substitutions of Leu-3188 (A), Ile-3192 (C), and Tyr-3195 (D) with Gln individually abolished the Cad23 peptide binding to the harmonin N-domain. (B and E) In contrast, replacement of Ala-3190 (B) or Leu-320 (E) with Gln had no obvious impact on its binding to the harmonin N-domain.



## Harmonin isoforms

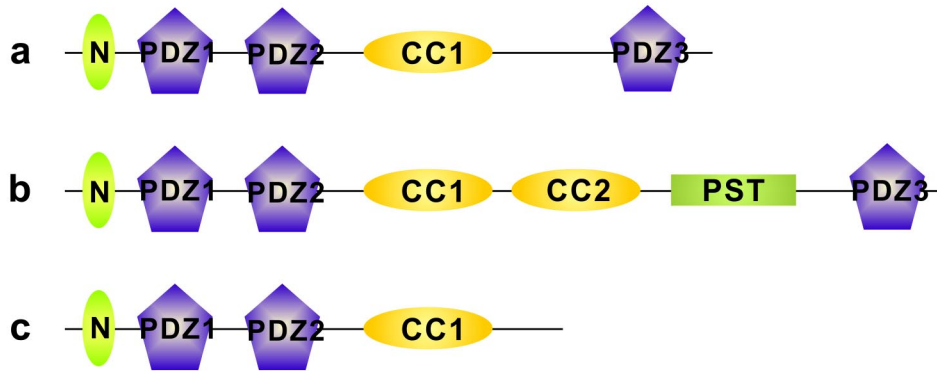

## Whirlin isoforms

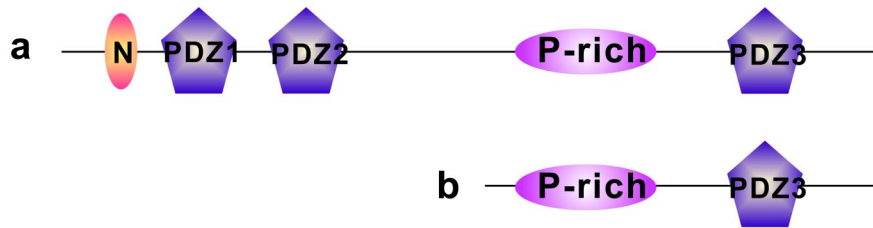

### Domain keys

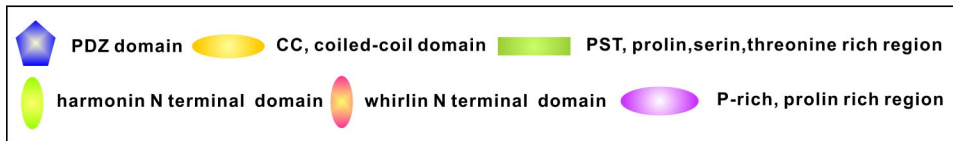

Fig. S5. Schematic diagram depicting the domain organizations of different isoforms of harmonin and whirlin.

**Table S1. Structural statistics for the family of 20 NMR structures of the harmonin N-domain, the N-domain in complex with the Cad23 peptide, and the harmonin PDZ2/Cad23 PBM complex**

| Statistic                                                      | N-domain          | N/Cad23 complex   | PDZ2/Cad23 complex |
|----------------------------------------------------------------|-------------------|-------------------|--------------------|
| Distance restraints                                            |                   |                   |                    |
| Intraresidue ( $i - j = 0$ )                                   | 533               | 654               | 505                |
| Sequential ( $ i - j  = 1$ )                                   | 272               | 335               | 462                |
| Medium range ( $2 \leq  i - j  \leq 4$ )                       | 228               | 266               | 318                |
| Long range ( $ i - j  \geq 5$ )                                | 174               | 192               | 725                |
| Hydrogen bonds                                                 | 70                | 86                | 52                 |
| Total                                                          | 1,277             | 1,533             | 2,062              |
| Dihedral angle restraints                                      |                   |                   |                    |
| $\Phi$                                                         | 57                | 72                | 48                 |
| $\Psi$                                                         | 57                | 72                | 48                 |
| Total                                                          | 114               | 144               | 96                 |
| Mean rmsd from the experimental restraints                     |                   |                   |                    |
| Distance, Å                                                    | 0.001 ± 0.000     | 0.014 ± 0.000     | 0.003 ± 0.000      |
| Dihedral, °                                                    | 0.010 ± 0.008     | 0.235 ± 0.019     | 0.267 ± 0.048      |
| Mean rmsd from idealized covalent geometry                     |                   |                   |                    |
| Bond, Å                                                        | 0.001 ± 0.000     | 0.002 ± 0.000     | 0.001 ± 0.000      |
| Angle, °                                                       | 0.319 ± 0.005     | 0.355 ± 0.011     | 0.290 ± 0.004      |
| Improper, °                                                    | 0.125 ± 0.008     | 0.223 ± 0.011     | 0.134 ± 0.006      |
| Mean energies, (kcal·mol <sup>-1</sup> )                       |                   |                   |                    |
| $E_{\text{NOE}}^*$                                             | 2.98 ± 0.25       | 24 ± 1.43         | 1.1 ± 0.12         |
| $E_{\text{cdih}}^*$                                            | 0.00 ± 0.00       | 0.49 ± 0.08       | 0.43 ± 0.15        |
| $E_{\text{L-J}}$                                               | -280.6 ± 16.1     | -342.0 ± 12.6     | -322.8 ± 15.1      |
| Ramachandran plot <sup>†</sup>                                 |                   |                   |                    |
| % residues in the most favorable regions                       | 90.4              | 93.3              | 82.9               |
| Additional allowed regions                                     | 9.3               | 6.0               | 14.6               |
| Generously allowed regions                                     | 0.0               | 0.7               | 2.0                |
| Atomic rms differences, Å                                      |                   |                   |                    |
| Backbone heavy atoms (N, C <sup>α</sup> , and C <sup>β</sup> ) | 0.48 <sup>‡</sup> | 0.43 <sup>§</sup> | 0.35 <sup>¶</sup>  |
| Heavy atoms                                                    | 0.97 <sup>‡</sup> | 0.93 <sup>§</sup> | 0.83 <sup>¶</sup>  |

None of the structures exhibits distance violations >0.3 Å or dihedral angle violations >4°.

\*The final values of the square-well NOE and dihedral angle potentials were calculated with force constants of 50 kcal·mol<sup>-1</sup>Å<sup>-1</sup> and 200 kcal·mol<sup>-1</sup>rad<sup>-1</sup>.

†The PROCHECK-NMR program ([www.biochem.ucl.ac.uk/~roman/procheck\\_nmr/procheck\\_nmr.html](http://www.biochem.ucl.ac.uk/~roman/procheck_nmr/procheck_nmr.html)) was used to assess the overall quality of the structures.

‡Residues 4–77 of harmonin N-domain were used for superposition analysis.

§Residues 4–77 of N-domain plus the residues 3187–3197 of Cad23 peptide were used for superposition analysis.

¶Residues 209–216 and 222–298 of harmonin PDZ2 plus the last 5 residues of the Cad23 PBM were used for superposition analysis.
